# Supplementary material for: Extensive site-directed mutagenesis reveals interconnected functional units in the alkaline phosphatase active site
Source: eLife journal article supplement (doi:10.7554/elife.06181), 2015-04-22

Figure 8 – figure supplement 1. **Effect of K328 addition with (light green) or without D101 (dark green) present.**

The effect of adding K328 is the same, within approximately two-fold, whether D101 is present, indicating that these residues are essentially independent of one another.

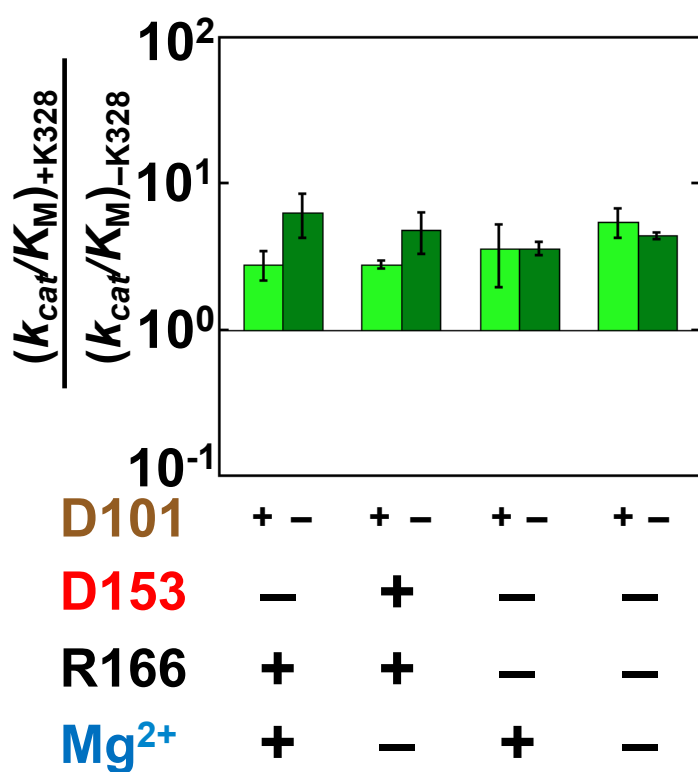

Supplement: supp [file elife-06181-supp-v1.zip]
