# Supplementary material for: Extensive site-directed mutagenesis reveals interconnected functional units in the alkaline phosphatase active site
Source: eLife journal article supplement (doi:10.7554/elife.06181), 2015-04-22

Figure 5 – figure supplement 2. **Removal of the active site  $\text{Mg}^{2+}$  ion does not disrupt R166 positioning.**

Superimposed crystal structures of  $\text{P}_i$ -bound E322Y AP (yellow, PDB 3DYC), which lacks the active site  $\text{Mg}^{2+}$  ion, and  $\text{P}_i$ -bound WT AP (purple, PDB 3TG0).

R166 overlays closely in these structures.

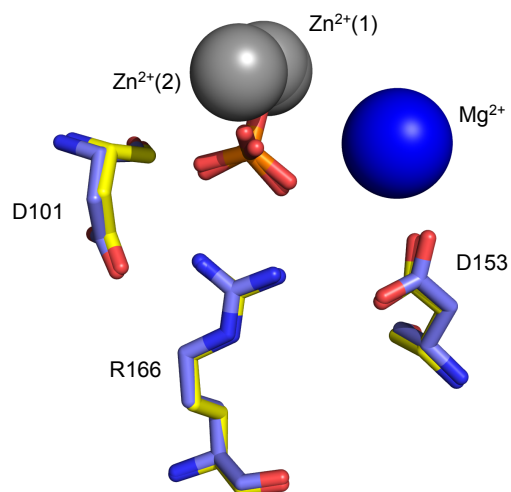

Supplement: supp [file elife-06181-supp-v1.zip]
