# Supplementary material for: Extensive site-directed mutagenesis reveals interconnected functional units in the alkaline phosphatase active site
Source: eLife journal article supplement (doi:10.7554/elife.06181), 2015-04-22

Figure 5 – figure supplement 1. **Ablation of D153 disrupts R166 positioning.**

Superimposed crystal structures of P<sub>i</sub>-bound WT AP (purple, PDB 3TG0), apo WT AP (grey, PDB 1ED9), and apo D153G AP (magenta). In two independent structures of D153G AP, R166 is rotated from its position in P<sub>i</sub>-bound WT AP by >19° (PDB 1AJC) or rotated away from the active site (PDB 1AJD).

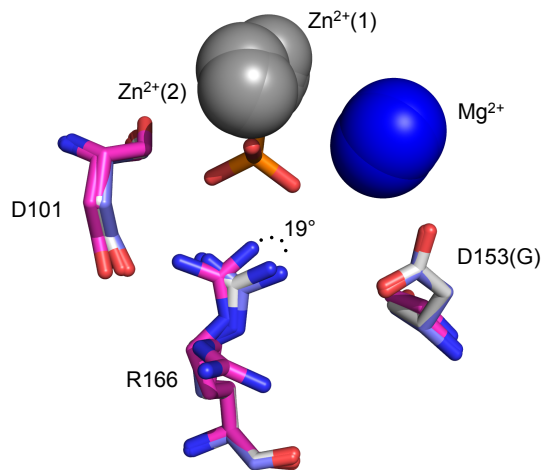

Supplement: supp [file elife-06181-supp-v1.zip]
